# Supplementary material for: A novel biocompatible, simvastatin-loaded, bone-targeting lipid nanocarrier for treating osteoporosis more effectively
Source: Royal Society of Chemistry journal article supplement (doi:10.1039/d0ra00685h), 2020-01-01
Supplement: d0ra00685h1.pdf [file d0ra00685h1.pdf]

## Supporting Information

### **A novel biocompatible, simvastatin-loaded, bone-targeting lipid nanocarrier for treating osteoporosis more effectively**

Shan Tao<sup>1</sup>, Shao-qing Chen<sup>1</sup>, Wen-tao Zhou<sup>1</sup>, Fang-ying Yu<sup>1</sup>, Lu Bao<sup>1</sup>, Guo-xi Qiu<sup>1</sup>, Qing Qiao<sup>2</sup>,  
Fu-qiang Hu<sup>1</sup>, Jian-wei Wang<sup>3\*</sup>, Hong Yuan<sup>1\*</sup>

1. College of Pharmaceutical Sciences, Zhejiang University, 866 Yuhangtang Road, Hangzhou, 310058, China

2. Anesthesia Department, Zhejiang University School of Medicine Sir Run Run Shaw Hospital, 3 Qingchun East Road, Hangzhou, 310016, China

3. Department of Orthopaedics, the Second Affiliated Hospital of Zhejiang University School of Medicine, 88 Jiefang Road, Hangzhou, 310009, China

Corresponding author: Hong Yuan, College of Pharmaceutical Sciences, Zhejiang University, 866 Yuhangtang Road, Hangzhou, 310058, China

E-mail: [yuanhong70@zju.edu.cn](mailto:yuanhong70@zju.edu.cn) Phone: 13606804049

Jian-wei Wang, Department of Orthopaedics, the Second Affiliated Hospital of Zhejiang University School of Medicine, 88 Jiefang Road, Hangzhou, 310009, China

E-mail: [zjuwjw@zju.edu.cn](mailto:zjuwjw@zju.edu.cn) Phone: 15958185118 Fax: 86-571-87022776

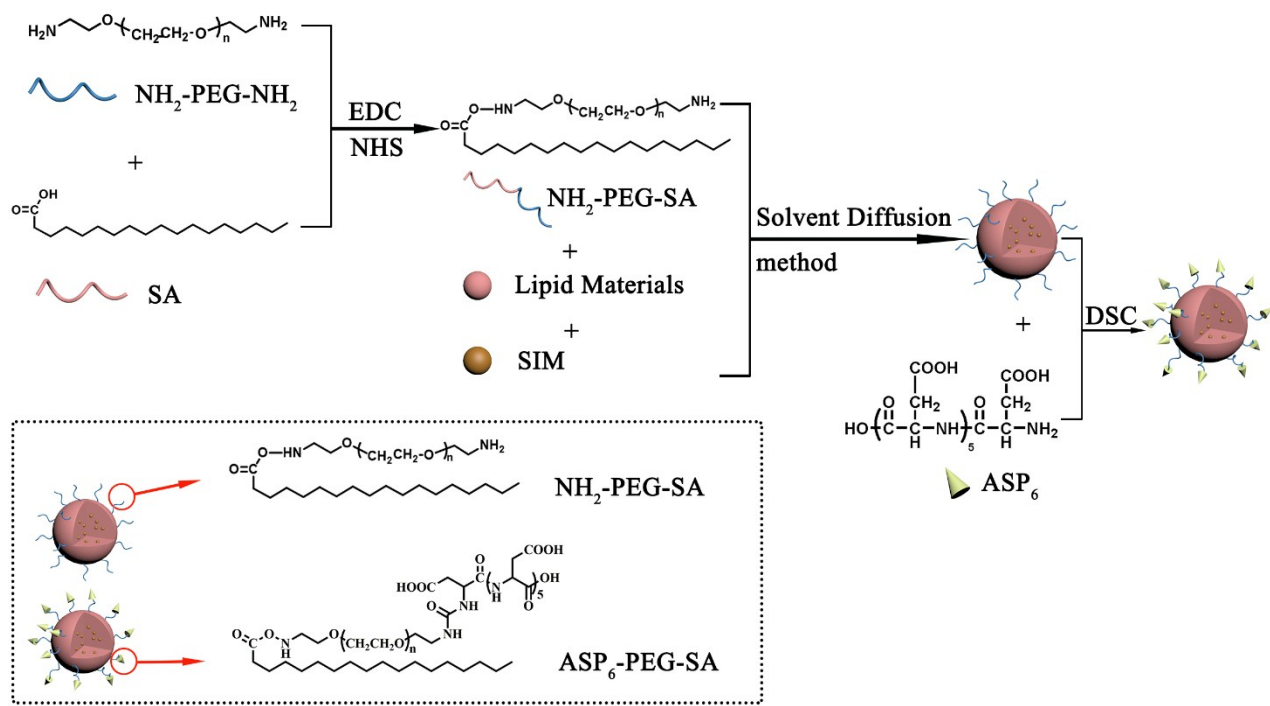

**Figure S1.** Design and synthetic route of lipid nanoparticles.

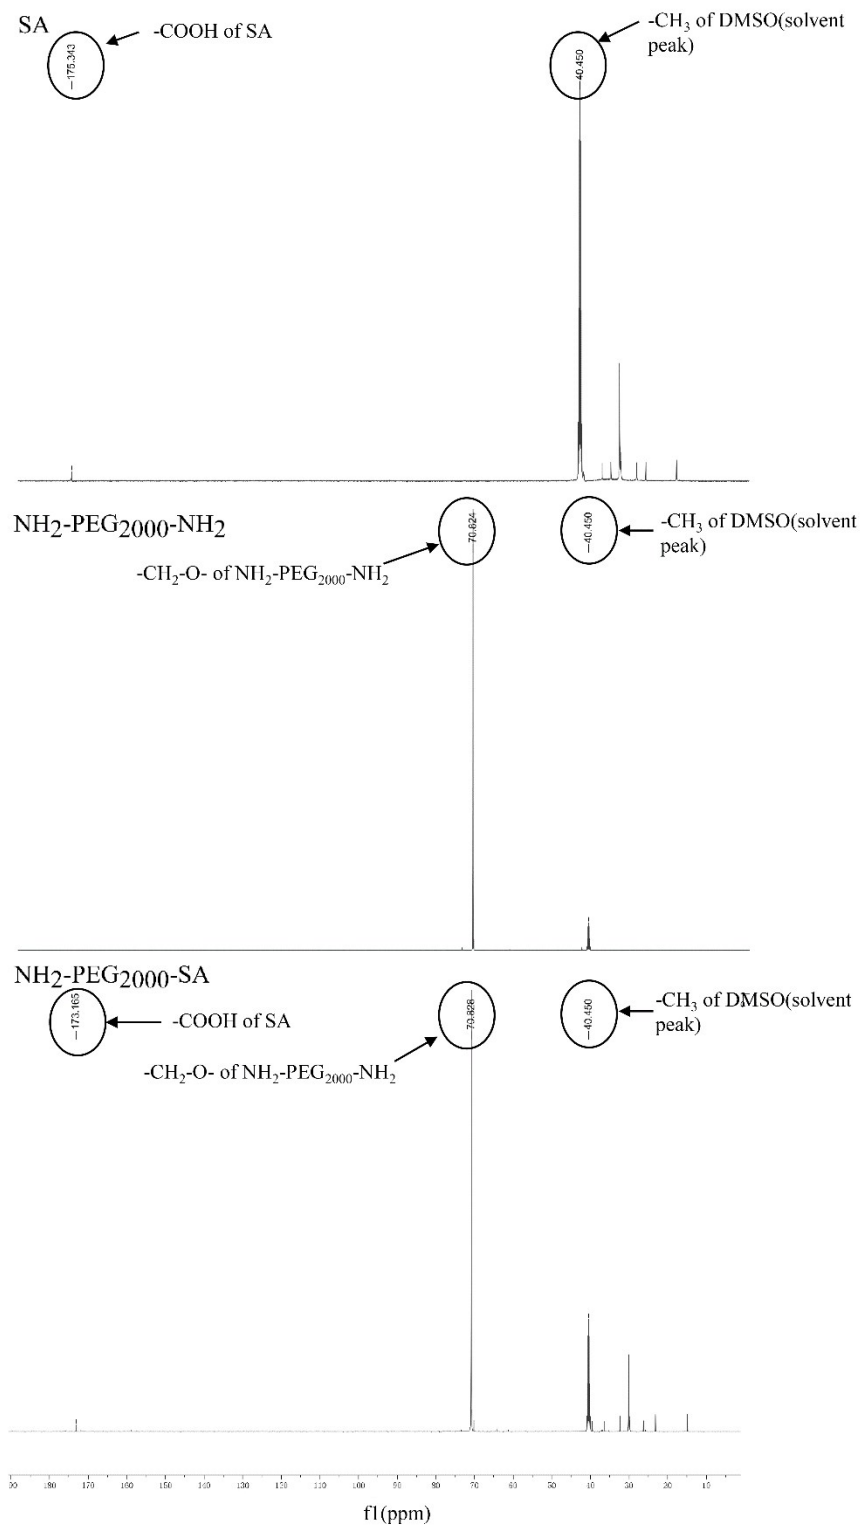

**Figure S2.**  $^{13}\text{C}$  NMR spectra of SA,  $\text{NH}_2\text{-PEG}_{2000}\text{-NH}_2$  and  $\text{NH}_2\text{-PEG}_{2000}\text{-SA}$ . All the chemicals were dissolved in DMSO.

SA

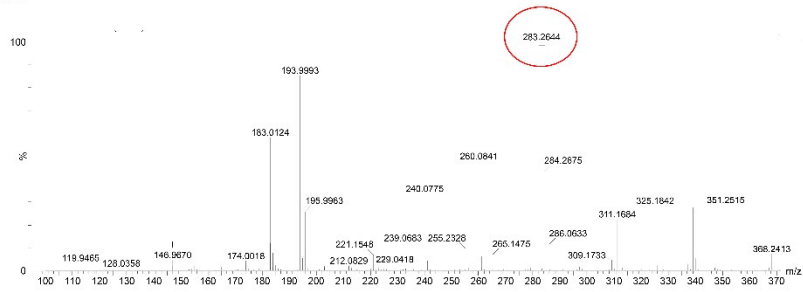

NH<sub>2</sub>-PEG<sub>2000</sub>-NH<sub>2</sub>

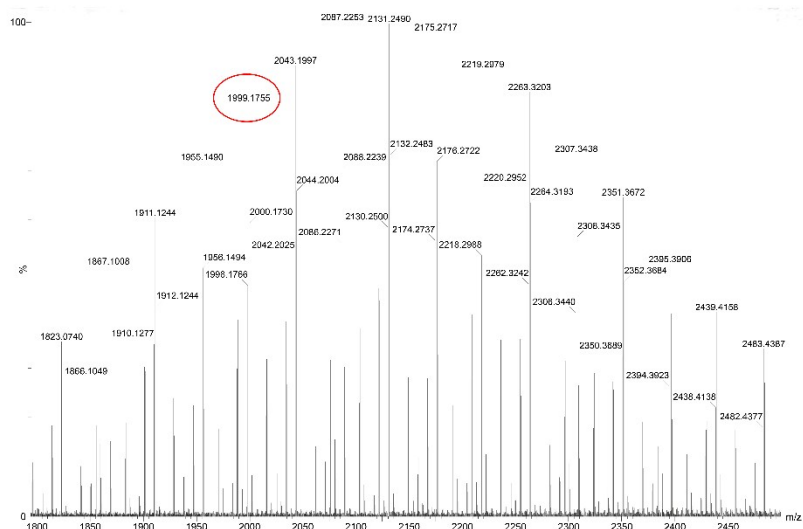

NH<sub>2</sub>-PEG<sub>2000</sub>-SA

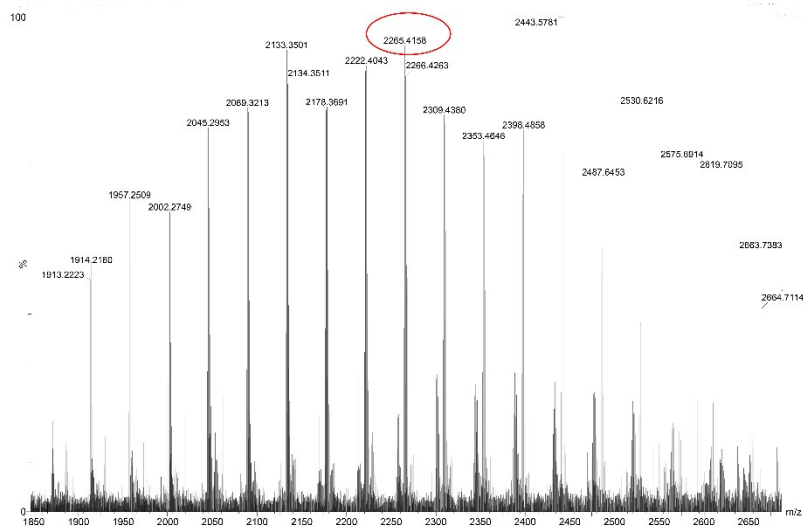

**Figure S3.** Mass spectrum of SA, NH<sub>2</sub>-PEG<sub>2000</sub>-NH<sub>2</sub> and NH<sub>2</sub>-PEG<sub>2000</sub>-SA. All the chemicals were dissolved in methanol.
